# Supplementary material
Source: Research Square preprint supplement (doi:10.21203/rs.3.rs-9721730/v1)
Supplement: Supplementary file 1 [file b68341310daa920fb1a3765c.docx]

**TABLE S1** Analysis of variance for severity of rachis tip dieback in three macadamia cultivars inoculated with different fungal species that cause flower blight and rachis tip dieback symptoms at various stages of raceme development (phenology) over two seasons.

| Variations | d.f. | Mean squares | Variance ratios | F values |
| --- | --- | --- | --- | --- |
| Season | 1 | 0.205 | 3.24 | 0.072 |
| Cultivar | 2 | 0.053 | 0.84 | 0.432 |
| Inoculum | **7** | 0.883 | 13.96 | **<0.001** |
| Phenology | 2 | 28.688 | 453.53 | **<0.001** |
| Cultivar× Inoculum | 14 | 0.127 | 2.01 | **0.015** |
| Cultivar× Phenology | 4 | 0.334 | 5.28 | **<0.001** |
| Inoculum× Phenology | 14 | 0.386 | 6.10 | **<0.001** |
| Cultivar× Inoculum× Phenology | 28 | 0.156 | 2.46 | **<0.001** |

d.f. is degrees of freedom. Statistically significant effects are in bold.
